# Supplementary material
Source: ML conference proceedings conference paper supplement (https://proceedings.mlr.press/v48/wange16.html)
Supplement: Supplementary file 1 [file wange16-supp.pdf]

# No penalty no tears: Least squares in high-dimensional linear models - Supplementary materials

## Appendix 0: Proof of Lemma 1

Applying the Sherman-Morrison-Woodbury formula

$$(A + UDV)^{-1} = A^{-1} - A^{-1}U(D^{-1} + VA^{-1}U)^{-1}VA^{-1},$$

we have

$$r(rI_p + X^T X)^{-1} = I_p - X^T(I_n + \frac{1}{r}XX^T)^{-1}X\frac{1}{r} = I_p - X^T(rI_n + XX^T)^{-1}X.$$

Multiplying  $X^T Y$  on both sides, we get

$$r(rI_p + X^T X)^{-1}X^T Y = X^T Y - X^T(rI_n + XX^T)^{-1}XX^T Y.$$

The right hand side can be further simplified as

$$\begin{aligned} & X^T Y - X^T(rI_n + XX^T)^{-1}XX^T Y \\ &= X^T Y - X^T(rI_n + XX^T)^{-1}(rI_n + XX^T - rI_n)Y \\ &= X^T Y - X^T Y + r(rI_n + XX^T)^{-1}Y = rX^T(rI_n + XX^T)^{-1}Y. \end{aligned}$$

Therefore, we have

$$(rI_p + X^T X)^{-1}X^T Y = X^T(rI_n + XX^T)^{-1}Y.$$

## Appendix A: Proof of Theorem 1

Recall the estimator  $\hat{\beta}^{(HD)} = X^T(XX^T)^{-1}Y = X^T(XX^T)^{-1}X\beta + X^T(XX^T)^{-1}\varepsilon = \xi + \eta$ . The following three lemmas will be used to bound  $\xi$  and  $\eta$  respectively.

**Lemma 2.** *Let  $\Phi = X^T(XX^T)^{-1}X$ . Assume  $p > c_0 n$  for some  $c_0 > 1$ , then for any  $C > 0$  there exists some  $0 < c_1 < 1 < c_2$  and  $c_3 > 0$  such that for any  $t > 0$  and any  $i \in Q, j \neq i$ ,*

$$P\left(|\Phi_{ii}| < c_1 \kappa^{-1} \frac{n}{p}\right) \leq 2e^{-Cn}, \quad |\Phi_{ii}| > c_2 \kappa \frac{n}{p} \leq 2e^{-Cn} \quad (1)$$

and

$$P\left(|\Phi_{ij}| > c_4 \kappa t \frac{\sqrt{n}}{p}\right) \leq 5e^{-Cn} + 2e^{-t^2/2}, \quad (2)$$

where  $c_4 = \frac{\sqrt{c_2(c_0 - c_1)}}{\sqrt{c_3(c_0 - 1)}}$ .

The proof can be found in the Lemma 4 and 5 in Wang and Leng (2015) for elliptical distributions. The special case of Gaussian is also proved in the Lemma 3 of Wang et al. (2015). Notice that the eigenvalue assumption in Wang and Leng (2015) is not used for proving Lemma 4 and 5.

**Lemma 3.** *Assume  $x_i$  follows  $EN(L, \Sigma)$ . If  $E[L^{-2}] < M_1$  for some constant  $M_1 > 0$ ,  $\text{var}(\epsilon) = \sigma^2$  and  $\log p = o(n)$ , then for any  $0 < \alpha < 1$  we have*

$$P\left(\|\eta\|_\infty \leq \frac{c_1 \kappa^{-1} \tau^* n}{6 p}\right) \geq 1 - O\left(\frac{\sigma^2 \kappa^4 \log p}{\tau^{*2} n^{1-\alpha}}\right),$$

where  $\tau^*$  is defined as the minimum value for the important signals and  $\kappa = \text{cond}(\Sigma)$ .

To prove Lemma 3 we need the following two propositions.

**Proposition 1.** *(Lounici, 2008 Lounici (2008); Nemirovski, 2000 Akritas et al. (2014)) Let  $Y_i \in \mathbb{R}^p$  be random vectors with zero means and finite variances. Then we have for any  $k$  norm with  $k \in [2, \infty]$  and  $p \geq 3$ , we have*

$$E\left\|\sum_{i=1}^n Y_i\right\|_k^2 \leq \tilde{C} \min\{k, \log p\} \sum_{i=1}^n E\|Y_i\|_k^2, \quad (3)$$

where  $\tilde{C}$  is some absolute constant.

As each row of  $X$  can be represented as  $X = \bar{L}Z\Sigma^{1/2}$ , where  $\bar{L} = \text{diag}(\sqrt{p}L_1/\|z_1\|_2, \dots, \sqrt{p}L_n/\|z_n\|_2)$  and  $Z$  is a matrix of independent Gaussian entries, i.e.,  $Z \sim N(0, I_p)$ . For  $Z$ , we have the following result.

**Proposition 2.** *Let  $Z \sim N(0, I_p)$ , then we have the minimum eigenvalue of  $ZZ^T/p$  satisfies that*

$$P\left(\lambda_{\min}(ZZ^T/p) > \left(1 - \frac{n}{p} - \frac{t}{p}\right)^2\right) \geq 1 - 2\exp(-t^2/2)$$

for any  $t > 0$ . Assume  $p > c_0 n$  for  $c_0 > 1$  and take  $t = \sqrt{n}$ . When  $n > 4c_0^2/(c_0 - 1)^2$ , we have

$$P\left(\lambda_{\min}(ZZ^T/p) > c\right) \geq 1 - 2\exp(-n/2), \quad (4)$$

where  $c = \frac{(c_0-1)^2}{4c_0^2}$ .

The proof follows Corollary 5.35 in Vershynin (2010).

**Proof of Lemma 3.** Let  $A = pX^T(XX^T)^{-1}\bar{L}$  and  $Z = \bar{L}^{-1}X\Sigma^{-1/2}$ . Then  $\eta = p^{-1}A\bar{L}^{-1}\epsilon$ .

**Part 1. Bounding  $|A_{ij}|$ .** Consider the standard SVD on  $Z$  as  $Z = VDU^T$ , where  $V$  and  $D$  are  $n \times n$  matrices and  $U$  is a  $p \times n$  matrix. Because  $Z$  is a matrix of iid Gaussian variables, its distribution is invariant under both left and right orthogonal transformation. In particular, for any  $T \in \mathcal{O}(n)$ , we have

$$TVDU^T \stackrel{(d)}{=} VDU^T,$$

i.e.,  $V$  is uniformly distributed on  $\mathcal{O}(n)$  conditional on  $U$  and  $D$  (they are in fact independent, but we don't need such a strong condition). Therefore, we have

$$\begin{aligned} A &= pX^T(XX^T)^{-1}L = p\Sigma^{\frac{1}{2}}Z^T L(LZ\Sigma Z^T L)^{-1}L = p\Sigma^{\frac{1}{2}}UDV^T L(LVDU^T\Sigma UDV^T L)^{-1}L \\ &= p\Sigma^{\frac{1}{2}}U(U^T\Sigma U)^{-1}D^{-1}V^T = \sqrt{p}\Sigma^{\frac{1}{2}}U(U^T\Sigma U)^{-1}\left(\frac{D}{\sqrt{p}}\right)^{-1}V^T. \end{aligned}$$

Because  $V$  is uniformly distributed conditional on  $U$  and  $D$ , the distribution of  $A$  is also invariant under right orthogonal transformation conditional on  $U$  and  $D$ , i.e., for any  $T \in \mathcal{O}(n)$ , we have

$$A \stackrel{(d)}{=} AT. \quad (5)$$

Our first goal is to bound the magnitude of individual entries  $A_{ij}$ . Let  $v_i = e_i^T AA^T e_i$ , which is a function of  $U$  and  $D$  (see below). From (5), we know that  $e_i^T A$  is uniformly distributed on the sphere  $S^{n-1}(\sqrt{v_i})$  if conditional on  $v_i$  (i.e., conditional on  $U, D$ ), which implies that

$$e_i^T A \stackrel{(d)}{=} \sqrt{v_i} \left( \frac{x_1}{\sqrt{\sum_{j=1}^n x_j^2}}, \frac{x_2}{\sqrt{\sum_{j=1}^n x_j^2}}, \dots, \frac{x_n}{\sqrt{\sum_{j=1}^n x_j^2}} \right), \quad (6)$$

where  $x'_j$ s are iid standard Gaussian variables. Thus,  $A_{ij}$  can be bounded easily if we can bound  $v_i$ . Notice that for  $v_i$  we have

$$\begin{aligned} v_i &= e_i^T AA^T e_i = pe_i^T \Sigma^{\frac{1}{2}}U(U^T\Sigma U)^{-1}\left(\frac{D^2}{p}\right)^{-1}(U^T\Sigma U)^{-1}U^T\Sigma^{\frac{1}{2}}e_i \\ &= pe_i^T H(U^T\Sigma U)^{-\frac{1}{2}}\left(\frac{D^2}{p}\right)^{-1}(U^T\Sigma U)^{-\frac{1}{2}}H^T e_i \\ &\leq pe_i^T HH^T e_i \cdot \lambda_{\min}^{-1}(U^T\Sigma U) \cdot \lambda_{\min}^{-1}\left(\frac{D^2}{p}\right) \end{aligned}$$

Here  $H = \Sigma^{\frac{1}{2}}U(U^T\Sigma U)^{-1/2}$  is defined the same as in Wang and Leng (2015) and can be bounded as  $e_i^T HH^T e_i \leq c_2 n \kappa / p$  with probability  $1 - 2 \exp(-Cn)$  (see the proof of Lemma 3 in Wang et al. (2015)). Therefore, we have

$$P\left(v_i \leq c_2 \kappa^2 \lambda_{\min}^{-1}\left(\frac{D^2}{p}\right)n\right) \geq 1 - 2 \exp(-Cn)$$

Now applying the tail bound and the concentration inequality to (6) we have for any  $t > 0$  and any  $C > 0$

$$P(|x_j| > t) \leq 2 \exp(-t^2/2) \quad P\left(\frac{\sum_{j=1}^n x_j^2}{n} \leq c_3\right) \leq \exp(-Cn). \quad (7)$$

Putting the pieces all together, we have for any  $t > 0$  and any  $C > 0$  that

$$P\left(\max_{ij} |A_{ij}| \leq \kappa t \sqrt{\frac{c_2}{c_3}} \lambda_{\min}^{-\frac{1}{2}}\left(\frac{D^2}{p}\right)\right) \geq 1 - 2np \exp(-t^2/2) - 3p \exp(-Cn).$$

Now according to (4), we can further bound  $\lambda_{\min}(D^2/p)$  and obtain that

$$P\left(\max_{ij} |A_{ij}| \leq \sqrt{\frac{c_2}{cc_3}} \kappa t\right) \geq 1 - 2np \exp(-t^2/2) - 3p \exp(-Cn) - 2 \exp(-n/2). \quad (8)$$

**Part 2. Bounding  $\eta$**  The second step is to use (8) and Proposition 1 to bound  $\eta$ . The procedure follows similarly as in Lounici's paper. We first note that  $\|z_i\|_2^2$  follows a chi-square distribution  $\mathcal{X}^2(p)$ . We have for any  $t$

$$P\left(\frac{\|z_i\|_2^2}{p} \geq 1 + 2\sqrt{\frac{t}{p}} + \frac{2t}{p}\right) \leq e^{-t},$$

from which we know

$$P\left(\max_i p^{-1}\|z_i\|_2^2 < 5/2\right) \geq 1 - pe^{-p/4}. \quad (9)$$

Now define  $W_j = (A_{1j}p^{-1/2}\|z_j\|_2L_j^{-1}\epsilon_j, A_{2j}p^{-1/2}\|z_j\|_2L_j^{-1}\epsilon_j, \dots, A_{pj}p^{-1/2}\|z_j\|_2L_j^{-1}\epsilon_j)$ . It's clear that  $\eta = \sum_{j=1}^n W_j/p$ . Applying Proposition 1 to  $W_j$ 's with the  $l_\infty$  norm and noticing that  $L_j$  is independent of  $z_j$  we have

$$E\left\|\sum_{j=1}^n W_j\right\|_\infty^2 \leq \log p \sum_{j=1}^n E\|W_j\|_\infty^2 \leq \log p \frac{7c_2}{cc_3} \sigma^2 \kappa^2 t^2 \sum_{j=1}^n E[L_j^{-2}] \leq \frac{c_2}{cc_3} \sigma^2 \kappa^2 t^2 M_1^2 n \log p.$$

Using the Markov inequality on  $\eta$ , we have for any  $r > 0$

$$\begin{aligned} P\left(\|\eta\|_\infty \geq \frac{\sqrt{nr}}{p}\right) &= P\left(\frac{p}{\sqrt{n}}\|\eta\|_\infty \geq r\right) \leq \frac{p^2 E\|\eta\|_\infty^2}{nr^2} = \frac{E\left\|\sum_{j=1}^n W_j\right\|_\infty^2}{nr^2} \\ &\leq \frac{7c_2 \sigma^2 \kappa^2 M_1^2 t^2 \log p}{cc_3 r^2}. \end{aligned}$$

To match our previous result, we take  $r = c_1 \sqrt{n} \tau^* \kappa^{-1}/6$  and  $t = n^{(1-\alpha)/2}$  for some small  $\alpha$ ,

$$\begin{aligned} P\left(\|\eta\|_\infty \leq \frac{c_1 \kappa^{-1} \tau^* n}{6p}\right) &\geq 1 - \frac{342c_2 \sigma^2 \kappa^4 M_1 \log p}{c_1^2 cc_3 \tau^{*2} n^\alpha} - 2np \exp(-n^{1-\alpha}/2) - 3p \exp(-Cn) - 2 \exp(-n/2) \\ &\geq 1 - O\left(\frac{\sigma^2 \kappa^4 \log p}{\tau^{*2} n^\alpha}\right). \end{aligned}$$

□

**Lemma 4.** Assume  $\text{var}(Y) \leq M_0$ . Define  $\Phi = X^T(XX^T)^{-1}X$ . If  $p > c_0 n$  for some  $c_0 > 1$ , then we have for any  $t > 0$

$$P\left(\max_i \sum_{j \neq i} |\Phi_{ij} \beta_j| \geq c_4 \sqrt{M_0} \kappa^{\frac{3}{2}} t \frac{\sqrt{n}}{p}\right) \leq 2pe^{-t^2/2} + 5pe^{-Cn}.$$

where  $c_4, \kappa$  are defined in Lemma 2.

**Proof of Lemma 4.** Following Wang and Leng (2015); Wang et al. (2015), we define  $H = X^T(XX^T)^{-\frac{1}{2}}$ . When  $X \sim N(0, \Sigma)$ ,  $H$  follows the  $MACG(\Sigma)$  distribution as indicated in Lemma 3 in Wang et al. (2015) and Theorem 1 in Wang and Leng (2015). For simplicity, we only consider a particular case where  $i = 1$ .

For vector  $v$  with  $v_1 = 0$ , we define  $v' = (v_2, v_3, \dots, v_p)^T$  and we can always identify a  $(p-1) \times (p-1)$  orthogonal matrix  $T'$  such that  $T'v' = \|v'\|_2 e'_1$  where  $e'_1$  is a  $(p-1) \times 1$  unit vector with the first coordinate being 1. Now we define a new orthogonal matrix  $T$  as

$$T = \begin{pmatrix} 1 & 0 \\ 0 & T' \end{pmatrix}$$

and we have

$$Tv = \begin{pmatrix} 1 & 0 \\ 0 & T' \end{pmatrix} \begin{pmatrix} 0 \\ v' \end{pmatrix} = \begin{pmatrix} 0 \\ \|v\|_2 e_1' \end{pmatrix} = \|v\|_2 e_2. \quad \text{and} \quad e_1^T T^T = e_1^T \begin{pmatrix} 1 & 0 \\ 0 & T'^T \end{pmatrix} = e_1^T$$

Therefore, we have

$$e_1^T H H^T v = e_1^T T^T T H H^T T^T T v = e_1^T T^T H H^T T^T e_2 = \|v\|_2 e_1^T \tilde{H} \tilde{H}^T e_2.$$

Since  $H$  follows  $MACG(\Sigma)$ ,  $\tilde{H} = T^T H$  follows  $MACG(T^T \Sigma T)$  for any fixed  $T$ . Therefore, we can apply Lemma 2 again to obtain that

$$\begin{aligned} P\left(|e_1^T X^T (X X^T)^{-1} X v| \geq \|v\|_2 c_4 \kappa t \frac{\sqrt{n}}{p}\right) &= P\left(|e_1^T H H^T v| \geq \|v\|_2 c_4 \kappa t \frac{\sqrt{n}}{p}\right) \\ &= P\left(\|v\|_2 |e_1^T \tilde{H} \tilde{H}^T e_2| \geq \|v\|_2 c_4 \kappa t \frac{\sqrt{n}}{p}\right) = P\left(\|v\|_2 |\Phi_{12}| \geq \|v\|_2 c_4 \kappa t \frac{\sqrt{n}}{p}\right) \\ &= P\left(|\Phi_{12}| \geq c_4 \kappa t \frac{\sqrt{n}}{p}\right) \leq 5e^{-Cn} + 2e^{-t^2/2}. \end{aligned}$$

Applying the above result to  $v = (0, \beta_*^{(-1)})$  we have

$$\sum_{j \neq 1} |\Phi_{1j} \beta_j| \leq c_4 \kappa t \|\beta\|_2 \frac{\sqrt{n}}{p}$$

with probability at least  $1 - 5e^{-Cn} - 2e^{-t^2/2}$ .

In addition, we know that  $\text{var}(Y) = \beta_*^T \Sigma \beta_* + \sigma^2 \leq M_0$  and thus

$$\|\beta\|_2 \leq \sqrt{M_0 \kappa}.$$

Consequently, we have

$$P\left(\max_i \sum_{j \neq i} |\Phi_{ij} \beta_j| \geq c_4 \sqrt{M_0} \kappa^{\frac{3}{2}} t \frac{\sqrt{n}}{p}\right) \leq 2pe^{-t^2/2} + 5pe^{-Cn}.$$

□

Now we are ready to prove Theorem 1

**Proof of Theorem 1.** Recall the definition of  $\xi$  as  $\xi = X^T (X X^T)^{-1} X \beta$ . For any  $i$  we have

$$\xi_i = e_i^T X^T (X X^T)^{-1} X \beta = \sum_{j \in S} \Phi_{ii} \beta_i + \sum_{j \neq i} \Phi_{ij} \beta_j,$$

For the first term, we have

$$|\min_{ii} \beta_i| \geq c_1 \kappa^{-1} \tau^* \frac{n}{p} \quad \forall i \in S^*$$

with probability  $1 - |S^*|e^{-Cn}$  and

$$|\min_{ii} \beta_i| \leq c_1 \kappa \tau_* \frac{n}{p} \quad \forall i \in S_*$$

with probability  $1 - |S_*|e^{-Cn}$ . Now, for the second term, using Lemma 4, we have

$$\sum_{j \neq i} |\Phi_{ij} \beta_j| \leq \frac{c_1 \kappa^{-1} \tau^*}{6} \quad \forall i = 1, 2, \dots, p$$

with probability at least  $1 - 2p \exp\{-\frac{c_1^2 \kappa^{-1} \tau^{*2}}{72c_4^2 M_0} n\} - 5pe^{-Cn}$ . Therefore, we have for any  $i \in S^*$

$$|\xi_i| \geq c_1 \kappa^{-1} \tau^* \frac{n}{p} - \frac{c_1 \kappa^{-1} \tau^* n}{6} \geq \frac{5c_1 \kappa^{-1} \tau^* n}{6} \frac{n}{p}.$$

and for  $i \in S_*$  we have

$$|\xi_i| \leq c_1 \kappa \tau_* \frac{n}{p} + \frac{c_1 \kappa^{-1} \tau^* n}{6} \leq \frac{7c_1 \kappa^{-1} \tau^* n}{12} \frac{n}{p},$$

where we use the assumption that  $\tau^* > 4\kappa^2 \tau_*$ . Now combining the result from Lemma 3, we can obtain

$$P\left(\min_{i \in S^*} |\hat{\beta}_i| \geq \frac{2c_1 \kappa^{-1} \tau^* n}{3} \frac{n}{p}\right) \geq 1 - O\left(\frac{\sigma^2 \kappa^4 \log p}{\tau^{*2} n^\alpha}\right),$$

and

$$P\left(\max_{i \in S_*} |\hat{\beta}_i| \leq \frac{7c_1 \kappa^{-1} \tau^* n}{12} \frac{n}{p}\right) \geq 1 - O\left(\frac{\sigma^2 \kappa^4 \log p}{\tau^{*2} n^\alpha}\right).$$

Taking  $\gamma = \frac{2c_1 \kappa^{-1} \tau^*}{3} np$ , we have

$$P\left(\min_{i \in S^*} |\hat{\beta}_i| \geq \gamma \geq \max_{i \in S_*} |\hat{\beta}_i|\right) \geq 1 - O\left(\frac{\sigma^2 \kappa^4 \log p}{\tau^{*2} n^\alpha}\right).$$

□

## Proof of Theorem 2 and 3

For the selected submodel  $\hat{\mathcal{M}}_d$ , we define  $X_d$  to be the variables contained in  $\hat{\mathcal{M}}_d$  and  $X_{d,c}$  to be variables that are excluded from  $\hat{\mathcal{M}}_d$ . It is clear that

$$\hat{\beta}_d^{(OLS)} = (X_d^T X_d)^{-1} X_d^T Y = \beta_d + (X_d^T X_d)^{-1} X_d^T \varepsilon + (X_d^T X_d)^{-1} X_d^T X_{d,c} \beta_{d,c} = \beta_d + \eta_d + \omega.$$

To prove Theorem 2 is essentially to bound  $\eta$  and  $\omega$ . Thus, we need following three lemmas.

**Lemma 5** (Garvesh, Wainwright and Yu. (2010) Raskutti et al. (2010)). *Assume  $Z \sim N(0, \Sigma)$ . There exists some absolute constant  $c', c'' > 0$  such that*

$$\frac{\|Zv\|_2}{\sqrt{n}} \geq \frac{1}{4} \|\Sigma^{\frac{1}{2}} v\|_2 - 9\rho(\Sigma) \sqrt{\frac{\log p}{n}} \|v\|_1, \quad \forall v \in \mathcal{R}^p,$$

with probability at least  $1 - c'' \exp(-c'n)$ , where  $\rho(\Sigma) = \max_{i=1,2,\dots,p} \Sigma_{ii}$ .

In our case, for any  $v$  with  $d$  nonzero coordinates, we have  $\|v\|_1 \leq \sqrt{d} \|v\|_2$ ,  $\rho(\Sigma) = 1$  and

$\|\Sigma^{1/2}v\|_2 \geq \lambda_{\min}^{\frac{1}{2}}(\Sigma)\|v\|_2$ . Therefore,

$$\frac{\|Zv\|_2}{\sqrt{n}} \geq \left( \frac{\lambda_{\min}^{\frac{1}{2}}(\Sigma)}{4} - 9\sqrt{\frac{d \log p}{n}} \right) \|v\|_2, \quad \|v\|_0 \leq d.$$

Thus, as long as  $n \geq 6^4 \kappa d \log p$ , we have

$$\min_{|\hat{\mathcal{M}}| \leq d} \lambda_{\min}^{1/2}(Z_{\hat{\mathcal{M}}}^T Z_{\hat{\mathcal{M}}}/n) \geq \frac{\lambda_{\min}^{\frac{1}{2}}(\Sigma)}{8}.$$

**Lemma 6.** Assume  $E[L^{-12}] \leq M_1$  and  $e[L^{12}] \leq M_2$ . For any  $\hat{\mathcal{M}}$  such that  $S^* \subset \hat{\mathcal{M}}$  and  $|\hat{\mathcal{M}}| \leq d$ , we have for any  $\alpha > 0$

$$P\left(\max_{|\hat{\mathcal{M}}| \leq d} \|\eta_d\|_{\infty} \leq \sigma \sqrt{\frac{\log p}{n^{\alpha}}}\right) = 1 - O\left(\frac{\lambda_*^{-2} d \log d}{n^{\frac{1}{3}(1-\alpha)}} + \frac{M_1 + M_2}{n^{\frac{1}{3}(1-4\alpha)}}\right),$$

where  $\lambda_* = \lambda_{\min}(\Sigma)$ .

**Proof of Lemma 6.** Define  $A = (X_d^T X_d)^{-1} X_d^T$ , we have

$$\eta = (X_d^T X_d)^{-1} X_d^T \epsilon = A\epsilon.$$

For  $A$ , we can bound its entries as

$$\begin{aligned} \max_{ij} |A_{ij}| &\leq \max_{ij} |e_i^T (X_d^T X_d)^{-1} X_d^T e_j| \leq \max_{ij} \|e_i^T (X_d^T X_d)^{-1}\|_1 \|X_d^T e_j\|_{\infty} \\ &\leq \sqrt{d} \max_{ij} \|e_i^T (X_d^T X_d)^{-1}\|_2 \max_{ij} |X_d^T| \leq \frac{\sqrt{d}}{n} \lambda_{\min}^{-1} \left( \frac{X_d^T X_d}{n} \right) \max_{ij} |X_d^T|. \end{aligned}$$

Recall that  $X = \bar{L} Z \Sigma^{1/2}$ , where  $\bar{L} = \text{diag}(\sqrt{p}L_1/\|z_1\|_2, \dots, \sqrt{p}L_n/\|z_n\|_2)$  and thus  $X_d$  possesses a representation as  $X_d = \bar{L} Z \Sigma_d^{1/2}$ , where  $\Sigma_d^{1/2}$  is an  $p \times d$  matrix formed by the selected  $d$  columns of  $\Sigma^{1/2}$ . We can now further bound  $\lambda_{\min}^{-1} \left( \frac{X_d^T X_d}{n} \right)$  as

$$\begin{aligned} \lambda_{\min}^{-1} \left( \frac{X_d^T X_d}{n} \right) &= \lambda_{\min}^{-1} \left( \frac{\Sigma_d^{\frac{T}{2}} Z^T \bar{L}^T \bar{L} Z \Sigma_d^{\frac{1}{2}}}{n} \right) \\ &\leq \left( \lambda_{\min}(\bar{L}^T \bar{L}) \lambda_{\min}(\Sigma_d^{\frac{T}{2}} Z^T Z \Sigma_d^{\frac{1}{2}}/n) \right)^{-1}. \end{aligned}$$

Using Lemma 5, it is clear that

$$\min_{|\hat{\mathcal{M}}| \leq d} \lambda_{\min}(\Sigma_d^{\frac{T}{2}} Z^T Z \Sigma_d^{\frac{1}{2}}/n) \geq \frac{\lambda_{\min}(\Sigma)}{64} \geq \frac{\lambda_*}{64},$$

with probability at least  $1 - O(e^{-c'n})$ . In addition, since  $E[L^{-12}] \leq M_1$  and  $E[L^{12}] \leq M_2$ , we have for any  $k_1 > 0, k_2 > 0$

$$P(L^2 \leq k_1) \leq k_1^6 M_1 \quad \text{and} \quad P(L \geq k_2) \leq \frac{M_2}{k_2^{12}}.$$

Combining with equation (9) implies that

$$\lambda_{\min}(\bar{L}^T \bar{L}) \geq \frac{2k_1}{5},$$

with probability at least  $1 - pe^{-p/4} - nk_1^6 M_1$ . Therefore, we have

$$\max_{|\hat{\mathcal{M}}| \leq d} \lambda_{\min}^{-1} \left( \frac{X_d^T X_d}{n} \right) \leq \frac{162}{\lambda_* k_1}.$$

with probability  $1 - O(nk_1^6 M_1)$ .

For  $\max_{ij} |X_d^T|$ , we just need to bound  $\max_{ij} X_{ij}$ . Using the representation  $X = \bar{L} Z \Sigma^{1/2}$ , we know that

$$X_{ij} = \frac{\sqrt{p} L_i}{\|z_i\|_2} Z_i \Sigma^{1/2} e_j.$$

It is easy to see that  $Z_i \Sigma^{1/2} e_j$  is a Gaussian random variable with mean zero and variance 1, thus for any  $t > 0$

$$P(|Z_i \Sigma^{1/2} e_j| \geq t) \leq 2e^{-t^2/2}.$$

In addition,  $\|z_i\|_2^2/p$  follows a  $\chi^2(p)$  and we have

$$P\left(\frac{\|z_i\|_2^2}{p} \geq 1 - 2\sqrt{\frac{t}{p}}\right) \geq 1 - e^{-t}.$$

Taking  $t = p/4$ , we have  $\max_i \|z_i\|_2/\sqrt{p} \geq 1/2$  with probability at least  $1 - ne^{-p/4}$  and thus

$$P(\max_{ij} |X_{ij}| \leq 4k_2 \sqrt{\log p}) \geq 1 - \frac{M_2 n}{k_2^{12}} - 2p^{-1} - ne^{-p/4}.$$

Combining all pieces of results, we obtain that

$$P\left(\min_{|\hat{\mathcal{M}}| \leq d} \max_{ij} |A_{ij}| \leq \frac{648k_2 \sqrt{d} \sqrt{\log p}}{\lambda_* k_1 n}\right) \geq 1 - O\left(nk_1^6 M_1 + \frac{nM_2}{k_2^{12}}\right).$$

Following a similar argument in proving Lemma 3, we define  $W_j = (A_{1j}\epsilon_j, A_{2j}\epsilon_j, \dots, A_{dj}\epsilon_j)$  and then

$$\eta = \sum_{j=1}^n W_j.$$

Using Proposition 1, we have

$$E\|\eta\|_\infty^2 = E\left\|\sum_{j=1}^n W_j\right\|_\infty^2 \leq \tilde{C} \log d \sum_{j=1}^n E\|W_j\|_\infty^2 \leq O\left(\frac{\sigma^2 k_2^2 d \log d \log p}{\lambda_*^2 k_1^2 n}\right).$$

Using the Markov inequality implies that for any  $r > 0$

$$P\left(\max_{|\hat{\mathcal{M}}| \leq d} \|\eta\|_\infty > r\right) \leq \frac{\|\eta\|_\infty^2}{r^2} = O\left(\frac{\sigma^2 k_2^2 d \log d \log p}{\lambda_*^2 k_1^2 r^2 n}\right) + O\left(nk_1^6 M_1 + \frac{nM_2}{k_2^{12}}\right).$$



Let  $r = \sigma \sqrt{\frac{\log p}{n^\alpha}}$ ,  $k_1 = n^{-\frac{2(1-\alpha)}{9}}$  and  $k_2 = n^{\frac{1-\alpha}{9}}$ , we have

$$P\left(\max_{|\mathcal{M}|\leq d} \|\eta\|_\infty \leq \sigma \sqrt{\frac{\log p}{n^\alpha}}\right) = 1 - O\left(\frac{\lambda_*^{-2} d \log d}{n^{\frac{1}{3}(1-\alpha)}} + \frac{M_1 + M_2}{n^{\frac{1}{3}(1-4\alpha)}}\right)$$

□

**Lemma 7.** Assume  $E[L^{-12}] \leq M_1$  and  $e[L^{12}] \leq M_2$ . For any  $\hat{\mathcal{M}}$  such that  $S^* \subset \hat{\mathcal{M}}$  and  $|\hat{\mathcal{M}}| \leq d$ . Assume that  $d - |S^*| \leq \tilde{c}$  and  $\sum_{i \notin S^*} |\beta_i|^\iota \leq R$  for some  $\iota \in (0, 1)$ , then for any  $\alpha > 0$ , we have

$$P\left(\max_{|\hat{\mathcal{M}}|\leq d} \|w\|_2 \leq \sigma \sqrt{\frac{\log p}{n^\alpha}}\right) \geq 1 - O\left(\frac{(M_1 + M_2)R^3}{(\log p)^{2\iota} n^{3-4\alpha-2\iota}}\right).$$

**Proof of Lemma 7.** According to our definition that  $\omega = (X_d^T X_d)^{-1} X_d^T X_{d,c} \beta_{d,c}$ , we can directly bound the  $l_2$  norm of  $\omega$  as

$$\|\omega\|_2^2 = \beta_{d,c}^T X_{d,c}^T X_d (X_d^T X_d)^{-2} X_d^T X_{d,c} \beta_{d,c} \leq \frac{1}{n} \beta_{d,c}^T X_{d,c}^T X_{d,c} \beta_{d,c} \lambda_{\min}^{-1}\left(\frac{X_d^T X_d}{n}\right)$$

where  $\lambda_{\min}^{-1}\left(\frac{X_d^T X_d}{n}\right)$  has already obtained a bound in Lemma 6 as

$$\max_{|\hat{\mathcal{M}}|\leq d} \lambda_{\min}^{-1}\left(\frac{X_d^T X_d}{n}\right) \leq \frac{162}{\lambda_* k_1}.$$

with probability  $1 - O(nk_1^6 M_1)$ . Now for  $\frac{1}{n} \beta_{d,c}^T X_{d,c}^T X_{d,c} \beta_{d,c}$  we have

$$\frac{1}{n} \beta_{d,c}^T X_{d,c}^T X_{d,c} \beta_{d,c} = \frac{1}{n} \beta_{d,c}^T \Sigma_{d,c}^{T/2} Z^T \bar{L}^T \bar{L} Z \Sigma_{d,c}^{1/2} \beta_{d,c} \leq \frac{1}{n} \beta_{d,c}^T \Sigma_{d,c}^{T/2} Z^T Z \Sigma_{d,c}^{1/2} \beta_{d,c} \max_i \frac{pL_i^2}{\|z_i\|_2^2}$$

Since  $Z \sim N(0, I_p)$ , we can choose an orthogonal matrix  $Q$  such that  $\beta_{d,c} \Sigma_{d,c}^{1/2} = e_1 Q \|\beta_{d,c} \Sigma_{d,c}^{1/2}\|_2$  and

$$\frac{1}{n} \beta_{d,c}^T \Sigma_{d,c}^{T/2} Z^T Z \Sigma_{d,c}^{1/2} \beta_{d,c} = \|\beta_{d,c} \Sigma_{d,c}^{1/2}\|_2^2 e_1^T \tilde{Z}^T \tilde{Z} e_1 \leq \|\beta_{d,c}\|_2^2 \lambda^* e_1^T \tilde{Z}^T \tilde{Z} e_1,$$

where  $\tilde{Z} \sim N(0, I_p)$ . It is easy to see that for any  $t > 0$

$$P\left(\frac{e_1^T \tilde{Z}^T \tilde{Z} e_1}{n} \leq 1 + 2\sqrt{\frac{t}{n}} + \frac{2t}{n}\right) \geq 1 - e^{-t}.$$

and  $\|\beta_{d,c}\|_2^2 \leq \tau_*^{2-\iota} R$ . Thus, taking  $t = (1 + \tilde{c}) \log p$ , we have

$$\max_{|\hat{\mathcal{M}}|\leq d} \frac{1}{n} \beta_{d,c}^T \Sigma_{d,c}^{T/2} Z^T Z \Sigma_{d,c}^{1/2} \beta_{d,c} \leq 5\tau_*^{2-\iota} R \lambda^*$$

with probability  $1 - p^{-1}$  as long as  $n \geq (1 + \tilde{c}) \log p$  where  $\tilde{c}$  is the upper bound on  $d - |S^*|$ . For  $\max_i pL_i^2 / \|z_i\|_2^2$ , we follow the same argument in Lemma 6

$$P\left(\max_i \frac{pL_i^2}{\|z_i\|_2^2} \leq 2k_2^2\right) \geq 1 - ne^{-p/4} - \frac{nM_2}{k_2^{12}}.$$

Putting all pieces together, we have

$$\max_{|\mathcal{M}| \leq d} \|w\|_2 \leq 36\tau_*^{1-\frac{\iota}{2}} R^{\frac{1}{2}} \kappa^{\frac{1}{2}} \sqrt{\frac{k_2^2}{k_1}},$$

with probability at least  $1 - O\left(\frac{nM_2}{k_2^{12}} + nk_1^6 M_1\right)$ . According to our assumption that  $\tau_* \leq \frac{\sigma}{\kappa} \sqrt{\frac{\log p}{n}}$  and taking  $k_1 = \frac{n^{\iota/4} R^{1/2}}{(\log p)^{\iota/4} n^{(1-\alpha)/2}}$  and  $k_2 = 1/\sqrt{k_1}$  we have

$$P\left(\max_{|\mathcal{M}| \leq d} \|w\|_2 \leq \sigma \sqrt{\frac{\log p}{n^\alpha}}\right) \geq 1 - O\left(\frac{(M_1 + M_2)R^3}{(\log p)^{2\iota} n^{3-4\alpha-2\iota}}\right).$$

□

We are now ready to prove Theorem 2

**Proof of Theorem 2.** We just need to combine the results of Lemma 6 and 7, i.e.,

$$\hat{\beta}_d^{(OLS)} = \beta_d + \eta + \omega,$$

where

$$P\left(\max_{|\mathcal{M}| \leq d} \|\eta\|_\infty \leq \sigma \sqrt{\frac{\log p}{n^\alpha}}\right) = 1 - O\left(\frac{\lambda_*^{-2} d \log d}{n^{\frac{1}{3}(1-\alpha)}} + \frac{M_1 + M_2}{n^{\frac{1}{3}(1-4\alpha)}}\right)$$

and

$$P\left(\max_{|\mathcal{M}| \leq d} \|w\|_2 \leq \sigma \sqrt{\frac{\log p}{n^\alpha}}\right) \geq 1 - O\left(\frac{(M_1 + M_2)R^3}{(\log p)^{2\iota} n^{3-4\alpha-2\iota}}\right).$$

Therefore, we have

$$P\left(\max_{|\mathcal{M}| \leq d, S^* \subset \mathcal{M}} \|\hat{\beta}_d^{(OLS)} - \beta_d\|_\infty \leq 2\sigma \sqrt{\frac{\log p}{n^\alpha}}\right) = 1 - O\left(\frac{\lambda_*^{-2} d \log d}{n^{\frac{1}{3}(1-\alpha)}} + \frac{M_1 + M_2}{n^{\frac{1}{3}(1-4\alpha)}} + \frac{(M_1 + M_2)R^3}{(\log p)^{2\iota} n^{3-4\alpha-2\iota}}\right)$$

□

**Proof of Theorem 3.** Recall that  $X_d$  consists of variables contained in  $\hat{\mathcal{M}}_d$ , the definition of  $\hat{\beta}(r)^{(Ridge)}$  becomes

$$\begin{aligned} \hat{\beta}(r)^{(Ridge)} &= (X_d^T X_d + rI_d)^{-1} X_d^T X_d \beta + (X_d^T X_d + rI_d)^{-1} X_d^T \varepsilon + (X_d^T X_d + rI_d)^{-1} X_d^T X_{d,c} \beta_{d,c} \\ &= \beta - r(X_d^T X_d + rI_d)^{-1} \beta + (X_d^T X_d + rI_d)^{-1} X_d^T \varepsilon + (X_d^T X_d + rI_d)^{-1} X_d^T X_{d,c} \beta_{d,c} \\ &= \beta - \tilde{\xi}(r) + \tilde{\eta}(r) + \tilde{\omega}(r). \end{aligned}$$

For  $\tilde{\xi}(r)$  we have

$$\|\tilde{\xi}(r)\|_2^2 \leq r^2 \beta^T (X_d^T X_d + rI_d)^{-2} \beta \leq \frac{r^2 \|\beta\|_2^2}{n^2 \lambda_{\min}^2 (X_d^T X_d/n + r/n)} \leq \frac{8^4 r^2 \kappa^3 M_0}{n^2}$$

As proved in Lemma 6, we know that

$$\max_{|\mathcal{M}| \leq d} \lambda_{\min} \left( \frac{X_d^T X_d}{n} \right) \geq \frac{\lambda_* k_1}{162}.$$

with probability  $1 - O(nk_1^6 M_1)$ . Adding  $r/n$  to the above matrix will only increase the smallest eigenvalue. Thus, we have

$$\|\tilde{\xi}(r)\|_2 \leq r^2 \beta^T (X_d^T X_d + rI_d)^{-2} \beta \leq \frac{162r\lambda^* M_0}{n\lambda_* k_1} = \frac{162r\kappa M_0}{nk_1}.$$

Where we used  $M_0 \geq \text{var}(Y) \geq \|\beta\|_2^2 \lambda_{\max}^{-1}(\Sigma)$ . Choosing  $k_1 = n^{-\frac{2(1-\alpha)}{9}}$ , we have

$$P\left(\max_{|\mathcal{M}|\leq d} \|\tilde{\xi}(r)\|_2 \leq \frac{162r\kappa M_0}{n^{\frac{1}{9}(7+2\alpha)}}\right) = 1 - O\left(\frac{M_1}{n^{\frac{1}{3}(1-4\alpha)}}\right),$$

which implies that as long as  $r \leq \frac{\sigma n^{(7/9-5\alpha/18)} \sqrt{\log p}}{162\kappa M_0}$ , we have

$$P\left(\max_{|\mathcal{M}|\leq d} \|\tilde{\xi}(r)\|_2 \leq \sigma \sqrt{\frac{\log p}{n^\alpha}}\right) = 1 - O\left(\frac{M_1}{n^{\frac{1}{3}(1-4\alpha)}}\right).$$

In addition, the proof for  $\|\eta\|_\infty$  and  $\|\omega\|_2$  shows that the only key quantity that has changed is  $\max_{|\mathcal{M}|\leq d} \lambda_{\min}\left(\frac{X_d^T X_d}{n}\right)$  which is replaced by  $\max_{|\mathcal{M}|\leq d} \lambda_{\min}\left(\frac{X_d^T X_d + rI_d}{n}\right)$  for  $\beta^{(\text{ridge})}$ . While the latter is trivially lower bounded by the former, we thus have

$$P\left(\max_{|\mathcal{M}|\leq d} \|\tilde{\eta}(r)\|_\infty \leq \sigma \sqrt{\frac{\log p}{n^\alpha}}\right) = 1 - O\left(\frac{\lambda_*^{-2} d \log d}{n^{\frac{1}{3}(1-\alpha)}} + \frac{M_1 + M_2}{n^{\frac{1}{3}(1-4\alpha)}}\right)$$

and

$$P\left(\max_{|\mathcal{M}|\leq d} \|\tilde{w}(r)\|_2 \leq \sigma \sqrt{\frac{\log p}{n^\alpha}}\right) \geq 1 - O\left(\frac{(M_1 + M_2)R^3}{(\log p)^{2\iota} n^{3-4\alpha-2\iota}}\right).$$

Consequently, we have

$$P\left(\max_{|\mathcal{M}|\leq d, S^* \subset \mathcal{M}} \|\hat{\beta}_d^{(\text{ridge})} - \beta_d\|_\infty \leq 3\sigma \sqrt{\frac{\log p}{n^\alpha}}\right) = 1 - O\left(\frac{\lambda_*^{-2} d \log d}{n^{\frac{1}{3}(1-\alpha)}} + \frac{2M_1 + M_2}{n^{\frac{1}{3}(1-4\alpha)}} + \frac{(M_1 + M_2)R^3}{(\log p)^{2\iota} n^{3-4\alpha-2\iota}}\right),$$

as long as

$$r \leq \frac{\sigma n^{(7/9-5\alpha/18)} \sqrt{\log p}}{162\kappa M_0}.$$

□

**Proof of Corollary 1.** As mentioned before, we have  $\hat{\beta}^{(OLS)} = \beta_{\tilde{\mathcal{M}}_d} + (X_{\tilde{\mathcal{M}}_d}^T X_{\tilde{\mathcal{M}}_d})^{-1} X_{\tilde{\mathcal{M}}_d} \varepsilon$ . Because  $\varepsilon_i \sim N(0, \sigma^2)$  for  $i = 1, 2, \dots, n$ , we have for any  $i \in \tilde{\mathcal{M}}_d$ ,

$$\tilde{\eta}_i = e_i^T (X_{\tilde{\mathcal{M}}_d}^T X_{\tilde{\mathcal{M}}_d})^{-1} X_{\tilde{\mathcal{M}}_d}^T \varepsilon \sim N(0, \sigma^2 e_i^T (X_{\tilde{\mathcal{M}}_d}^T X_{\tilde{\mathcal{M}}_d})^{-1} e_i) \stackrel{(d)}{=} \sigma \sqrt{e_i^T (X_{\tilde{\mathcal{M}}_d}^T X_{\tilde{\mathcal{M}}_d})^{-1} e_i} N(0, 1). \quad (10)$$

Likewise in the proof of Lemma 5, we know that as long as  $n \geq 64\kappa d \log p$

$$\lambda_{\min}(X_{\tilde{\mathcal{M}}_d}^T X_{\tilde{\mathcal{M}}_d}/n) \geq \frac{1}{64\kappa}.$$

Thus, we have

$$\max_{i \in \tilde{\mathcal{M}}_d} e_i^T (X_{\tilde{\mathcal{M}}_d}^T X_{\tilde{\mathcal{M}}_d})^{-1} e_i \leq 64\kappa/n.$$

Therefore, for any  $t > 0$  and  $i \in \tilde{\mathcal{M}}_d$ , with probability at least  $1 - c'' \exp(-c'n) - 2 \exp(-t^2/2)$  we have

$$|\tilde{\eta}_i| \leq \sigma t \sqrt{e_i^T (X_{\tilde{\mathcal{M}}_d}^T X_{\tilde{\mathcal{M}}_d})^{-1} e_i} \leq \frac{8\kappa^{\frac{1}{2}} \sigma t}{\sqrt{n}}.$$

Then for any  $\delta > 0$ , if  $n > \log(2c''/\delta)/c'$ , then with probability at least  $1 - \delta$  we have

$$\max_{i \in \tilde{\mathcal{M}}_d} |\tilde{\eta}_i| \leq 8\sigma \sqrt{\frac{2\kappa \log(4d/\delta)}{n}}. \quad (11)$$

Because  $\sigma$  needs to be estimated from the data, we need to obtain a bound as well. Notice that  $\hat{\sigma}^2$  is an unbiased estimator for  $\sigma$ , and

$$\hat{\sigma}^2 = \sigma^2 \epsilon^T (I_n - X_{\tilde{\mathcal{M}}_d} (X_{\tilde{\mathcal{M}}_d}^T X_{\tilde{\mathcal{M}}_d})^{-1} X_{\tilde{\mathcal{M}}_d}) \epsilon \sim \frac{\sigma^2 \mathcal{X}^2(n-d)}{n-d},$$

where  $\mathcal{X}^2(k)$  denotes a chi-square random variable with degree of freedom  $k$ . Using Proposition 5.16 in Vershynin (2010), we can bound  $\hat{\sigma}^2$  as follows. Let  $K = \|\mathcal{X}^2(1) - 1\|_{\psi_1}$ . There exists some  $c_5 > 0$  such that for any  $t \geq 0$  we have,

$$P\left(\left|\frac{\mathcal{X}^2(n-d)}{n-d} - 1\right| \geq t\right) \leq 2 \exp\left\{-c_5 \min\left(\frac{t^2(n-d)}{K^2}, \frac{t(n-d)}{K}\right)\right\}.$$

Hence for any  $\delta > 0$ , if  $n > d + 4K^2 \log(2/\delta)/c_5$ , then with probability at least  $1 - \delta$  we have,

$$|\hat{\sigma}^2 - \sigma^2| \leq \sigma^2/2,$$

which implies that

$$\frac{1}{2}\sigma^2 \leq \hat{\sigma}^2 \leq \frac{3}{2}\sigma^2.$$

Then we know that

$$\max_{i \in \tilde{\mathcal{M}}_d} |\tilde{\eta}_i| \leq 8\sigma \sqrt{\frac{2\kappa \log(4d/\delta)}{n}} \leq 8\sqrt{2}\hat{\sigma} \sqrt{\frac{2\kappa \log(4d/\delta)}{n}} \leq 8\sqrt{3}\sigma \sqrt{\frac{2\kappa \log(4d/\delta)}{n}}.$$

Now define  $\gamma' = 8\sqrt{2}\hat{\sigma} \sqrt{\frac{2\kappa \log(4d/\delta)}{n}}$ . If the signal  $\tau = \min_{i \in S} |\beta_i|$  satisfies that

$$\tau \geq 24\sigma \sqrt{\frac{2\kappa \log(4d/\delta)}{n}},$$

then with probability at least  $1 - 2\delta$ , for any  $i \notin S$

$$|\hat{\beta}_i| = |\tilde{\eta}_i| \leq 8\sigma \sqrt{\frac{2\kappa \log(4d/\delta)}{n}} \leq \gamma',$$

and for  $i \in S$  we have

$$|\hat{\beta}_i| \geq \tau - \max_{i \in \tilde{\mathcal{M}}_d} |\tilde{\eta}_i| \geq 16\sigma \sqrt{\frac{2\kappa \log(4d/\delta)}{n}} \geq \gamma'.$$

## References

- Akritis, M. G., Lahiri, S., and Politis, D. N. (2014). Topics in nonparametric statistics. In *Proceedings of the First Conference of the International Society for Nonparametric Statistics*. Springer.
- Lounici, K. (2008). Sup-norm convergence rate and sign concentration property of lasso and dantzig estimators. *Electronic Journal of Statistics*, 2:90–102.
- Raskutti, G., Wainwright, M. J., and Yu, B. (2010). Restricted eigenvalue properties for correlated gaussian designs. *The Journal of Machine Learning Research*, 11:2241–2259.
- Vershynin, R. (2010). Introduction to the non-asymptotic analysis of random matrices. *arXiv preprint arXiv:1011.3027*.
- Wang, X. and Leng, C. (2015). High dimensional ordinary least squares projection for screening variables. *Journal of the Royal Statistical Society: Series B (Statistical Methodology)*.
- Wang, X., Leng, C., and Dunson, D. B. (2015). On the consistency theory of high dimensional variable screening. *arXiv preprint arXiv:1502.06895*.
